# Supplementary material
Source: HighWire-hosted journal article supplement (https://bmjopen.bmj.com/content/14/10/e089773)
Supplement: inline-supplementary-material-2 [file inline-supplementary-material-2.pdf]

Supplementary Table: Assessment of Methodological Quality (JBI Critical Appraisal Tool: Checklist for Qualitative Research).

|                                                                                                                                                    | Bateman<br>(2015) | Docking<br>et al.<br>(2018) | Elliott &<br>Bluebelle<br>Study<br>Group<br>(2017) | Furness<br>et al.<br>(2019) | Grocott<br>et al.<br>(2013) | Probst<br>et al.<br>(2023) | Roma<br>et al.<br>(2021) | Unver<br>et al.<br>(2018) | Wang<br>et al.<br>(2015) |
|----------------------------------------------------------------------------------------------------------------------------------------------------|-------------------|-----------------------------|----------------------------------------------------|-----------------------------|-----------------------------|----------------------------|--------------------------|---------------------------|--------------------------|
| 1. Is there congruity between the stated philosophical perspective and the research methodology?                                                   | NA                | N                           | U                                                  | U                           | Y                           | Y                          | U                        | Y                         | Y                        |
| 2. Is there congruity between the research methodology and the research question or objectives?                                                    | U                 | Y                           | Y                                                  | Y                           | Y                           | Y                          | Y                        | Y                         | Y                        |
| 3. Is there congruity between the research methodology and the methods used to collect data?                                                       | Y                 | Y                           | Y                                                  | Y                           | Y                           | Y                          | Y                        | Y                         | Y                        |
| 4. Is there congruity between the research methodology and the representation and analysis of data?                                                | U                 | Y                           | Y                                                  | Y                           | Y                           | Y                          | Y                        | Y                         | Y                        |
| 5. Is there congruity between the research methodology and the interpretation of results?                                                          | Y                 | Y                           | Y                                                  | Y                           | Y                           | Y                          | Y                        | Y                         | Y                        |
| 6. Is there a statement locating the researcher culturally or theoretically?                                                                       | N                 | N                           | N                                                  | N                           | N                           | N                          | N                        | U                         | U                        |
| 7. Is the influence of the researcher on the research, and vice versa, addressed?                                                                  | N                 | N                           | N                                                  | N                           | N                           | Y                          | N                        | N                         | N                        |
| 8. Are participants, and their voices, adequately represented?                                                                                     | Y                 | Y                           | Y                                                  | Y                           | Y                           | Y                          | Y                        | Y                         | Y                        |
| 9. Is the research ethical according to current criteria or, for recent studies, and is there evidence of ethical approval by an appropriate body? | N                 | Y                           | Y                                                  | Y                           | Y                           | Y                          | U                        | Y                         | Y                        |
| 10. Do the conclusions drawn in the research report flow from the analysis, or interpretation, of the data?                                        | Y                 | Y                           | U                                                  | Y                           | Y                           | Y                          | Y                        | Y                         | Y                        |

Y = Yes; N = No; U = Unclear; NA = Not Applicable
